# Supplementary material for: Brei ist nicht gleich Brei
Source: Springer Nature journal article supplement (doi:10.1007/s41906-022-1956-7), 2022-10-01
Supplement: MOESM1 [file 23607244]

## Literatur

### zum Beitrag „Brei ist nicht gleich Brei“

von Simon Sollereeder, Christoph Palli, Sandra Mack

*PflegeZeitschrift* (75) 11/2022, S. 26-28

Allen J, Green M, Sabido I, Stretton M and Miles A (2020) Economic costs of dysphagia among hospitalized patients. *The Laryngoscope* 130(4) 974-979

Bassi M, Cilia S, Falautano M, Grobberio M, Negri L, Niccolai C et al. (2020) The caring experience in multiple sclerosis: Caregiving tasks, coping strategies and psychological well-being. *Health Soc Care Community* 28(1) 236-246

Buchholz D W (1996) What is dysphagia? *Dysphagia* 11(1) 23-24

Checklin M, Bain J, Bath L, & Lethbridge K (2020) Patients' Perspectives on What Makes a Better Care Experience While Undergoing Treatment for Oropharyngeal Dysphagia Secondary to Head and Neck Cancer. *Dysphagia* 35(4) 702-716

Cichero J A, Steele C M, Duivesteyn J, Clavé P (2013) The Need for International Terminology and Definitions for Texture-Modified Foods and Thickened Liquids Used in Dysphagia Management: Foundations of a Global Initiative. *Current Physical Medicine and Rehabilitation Reports* 1(4) 280-291

Cichero J A, Lam P, Steele C M, Hanson B, Chen J, Dantas R O, Duivesteyn J, Kayashita J, Lecko C, Murray J, Pillay M, Riquelme L, Stanschus S (2017) Development of International Terminology and Definitions for Texture-Modified Foods and Thickened Fluids Used in Dysphagia Management: The IDDSI Framework. *Dysphagia* 32(2) 293-314

Dietitians Association of Australia and The Speech Pathology Association of Australia (2007) Texture-modified foods and thickened fluids as used for individuals with dysphagia: Australian standardised labels and definitions. *Nutrition & Dietetics*, 64(s2) 53-S76

Grady P A, Gough L L (2014). Self-management: a comprehensive approach to management of chronic conditions. *Am J Public Health* 104(8) 25-31

Kraemer M, Degen B, Ledl C, Pirker-Neuwirth S, Sollereeder S, Trapl-Grundschober M, Broersma T, Wonsikowski V (2019). Vollständige IDDSI-Grundstruktur und Beschreibung 2.0. <https://iddsi.org/> (Letzter Zugriff: 09.09.2022)

Keller H, Chambers L, Niezgoda H, Duizer L (2012) Issues associated with the use of modified texture foods. *The journal of nutrition, health & aging* 16(3) 195-200

Lang H, France E, Williams B, Humphris G, Wells M (2013) The psychological experience of living with head and neck cancer: a systematic review and meta-synthesis. *Psychooncology* 22(12) 2648-2663

Lutz B J, Young M E, Cox K J, Martz C, Creasy K R (2011) The crisis of stroke: experiences of patients and their family caregivers. *Top Stroke Rehabil* 18(6) 786-797

Miller N, Noble E, Jones D, Burn D (2006) Hard to swallow: dysphagia in Parkinson's disease. *Age and ageing* 35(6) 614-618

Newman R, Vilardell N, Clavé P, Speyer R (2016) Effect of Bolus Viscosity on the Safety and Efficacy of Swallowing and the Kinematics of the Swallow Response in Patients with Oropharyngeal Dysphagia: White Paper by the European Society for Swallowing Disorders (ESSD). *Dysphagia* 31(2) 232-249

Nund R L, Rumbach A F, Debattista B C, Goodrow M N, Johnson K A, Tupling L et al. (2015). Communication changes following non-glottic head and neck cancer management: The perspectives of survivors and carers. *International journal of speech-language pathology* 17(3) 263-272

Ottosson S, Laurell G, Olsson C (2013) The experience of food, eating and meals following radiotherapy for head and neck cancer: a qualitative study. *Journal of clinical nursing* 22(7-8) 1034-1043

Pirker-Neuwirth S, Sollereder S, Stanschus S (2020) Die International Dysphagia Diet Standardisation Initiative (IDDSI). Eine interprofessionelle Lösung und Herausforderung. *DIALOG* (2) 11-14

Sollereder S (2021) Die International Dysphagia Diet Standardisation Initiative (IDDSI) im deutschsprachigen Raum – Erfahrungen und Strategien für eine erfolgreiche Implementierung. *logopädieschweiz* (02) 27-35

Steele C M, Alsanei W A, Ayanikalath S, Barbon C E, Chen J, Cichero J A, Coutts K, Dantas R O, Duivesteyn J, Giosa L, Hanson B, Lam P, Lecko C, Leigh C, Nagy A, Namasivayam A M, Nascimento W V, Odendaal I, Smith C H, Wang H (2015) The influence of food texture and liquid consistency modification on swallowing physiology and function: a systematic review. *Dysphagia* 30 (1) 2-26

Ullrich S, Crichton J (2015) Older people with dysphagia: transitioning to texture-modified food. *British Journal of Nursing* 24(13) 686, 688-692

Warnecke T, Dziewas R (2018) *Neurogene Dysphagien*. 2. Aufl., Kohlhammer, Stuttgart
